# Supplementary material
Source: ML conference proceedings conference paper supplement (https://proceedings.mlr.press/v84/chen18d.html)
Supplement: Supplementary file [file chen18d-supp.pdf]

# Supplementary Material to Sparse Linear Isotonic Models

Sheng Chen

Department of Computer Science and Engineering, University of Minnesota, Twin Cities  
 {shengc, banerjee}@cs.umn.edu

Arindam Banerjee

## 1 Proof of Lemma 2

**Statement of Lemma:** *The transformed population Kendall's tau correlation vector  $\beta$  satisfies*

$$\beta = \frac{\tilde{\beta}}{\sigma_y} = \frac{\tilde{\Sigma}\tilde{\theta}}{\sigma_y}, \quad (\text{S.1})$$

where  $\sigma_y^2$  is the variance of  $y$ . The transformed sample Kendall's tau correlation vector  $\hat{\beta}$ , with probability at least  $1 - \frac{2}{p}$ , satisfies

$$\|\hat{\beta} - \beta\|_\infty \leq 2\pi\sqrt{\frac{\log p}{n}} \quad (\text{S.2})$$

*Proof:* By definition,  $\tilde{\beta} = \mathbb{E}[y\tilde{\mathbf{x}}] = \mathbb{E}_{\tilde{\mathbf{x}}}[\tilde{\mathbf{x}} \cdot \mathbb{E}_y[y|\tilde{\mathbf{x}}]] = \mathbb{E}[\tilde{\mathbf{x}}\tilde{\mathbf{x}}^T\tilde{\theta}] = \tilde{\Sigma}\tilde{\theta}$ . Given that  $\lambda_{\min} > 0$  and the properties of elliptical distribution (15), we have  $\mathbb{E}[\tilde{\mathbf{x}}] = \mathbf{0}$ ,  $\text{rank}(\mathbf{A}) = \text{rank}(\tilde{\Sigma}) = p$  and  $\text{Cov}[\tilde{\mathbf{x}}] = \tilde{\Sigma}$ . Since  $\tilde{\mathbf{x}}, y$  are jointly elliptical and  $\beta$  is invariant to  $\mathbf{f}$ , using Theorem 2 in [3], we have for each  $\beta_j$ ,

$$\beta_j = \frac{\mathbb{E}[y\tilde{x}_j] - \mathbb{E}[y]\mathbb{E}[\tilde{x}_j]}{\sqrt{\text{Var}[y]}\sqrt{\text{Var}[\tilde{x}_j]}} = \frac{\mathbb{E}[\langle \tilde{\theta}, \tilde{\mathbf{x}} \rangle \cdot \tilde{x}_j]}{\sqrt{\text{Var}[y]}} = \frac{\langle \tilde{\theta}, \tilde{\sigma}_j \rangle}{\sigma_y},$$

which implies (S.1). Using Hoeffding's inequality for U-statistics [2], we have for each  $\beta_j$  and  $\hat{\beta}_j$

$$\begin{aligned} \mathbb{P}\left(|\beta_j - \hat{\beta}_j| \geq \epsilon\right) &\leq \mathbb{P}\left(|b_j - \hat{b}_j| \geq \frac{2}{\pi}\epsilon\right) \\ &\leq 2 \exp\left(-\frac{n\epsilon^2}{2\pi^2}\right). \end{aligned}$$

Letting  $\epsilon = 2\pi\sqrt{\frac{\log p}{n}}$  and taking union bound, we obtain

$$\mathbb{P}\left(\|\beta - \hat{\beta}\|_\infty \geq 2\pi\sqrt{\frac{\log p}{n}}\right) \leq \frac{2}{p},$$

which completes the proof. ■

## 2 Proof of Lemma 3

**Statement of Lemma:** *Define the descent cone for any  $s$ -sparse vector  $\theta^* \in \mathbb{R}^p$ ,*

$$\mathcal{C} = \{\mathbf{v} \in \mathbb{R}^p \mid \|\theta^* + \mathbf{v}\|_1 \leq \|\theta^*\|_1\}. \quad (\text{S.3})$$

If  $\mathbf{x} \sim TE(\tilde{\Sigma}, \xi, \mathbf{f})$  and  $n \geq \left(\frac{24\pi}{\lambda_{\min}}\right)^2 s^2 \log p = O(s^2 \log p)$ , with probability at least  $1 - p^{-2.5}$ , the following RE condition holds for  $\hat{\Sigma}$  in  $\mathcal{C}$ ,

$$\inf_{\mathbf{v} \in \mathcal{C} \cap \mathbb{S}^{p-1}} \mathbf{v}^T \hat{\Sigma} \mathbf{v} \geq \frac{\lambda_{\min}}{2}, \quad (\text{S.4})$$

where  $\lambda_{\min}$  is the smallest eigenvalue of  $\tilde{\Sigma}$ .

*Proof:* Let  $\mathcal{S}$  be the support of  $\theta^*$ , then we have

$$\begin{aligned} \mathbf{v} \in \mathcal{C} \cap \mathbb{S}^{p-1} &\implies \|\theta_{\mathcal{S}}^* + \mathbf{v}_{\mathcal{S}}\|_1 + \|\mathbf{v}_{\mathcal{S}^c}\|_1 \leq \|\theta^*\|_1 \\ &\implies \|\theta_{\mathcal{S}}^*\|_1 - \|\mathbf{v}_{\mathcal{S}}\|_1 + \|\mathbf{v}_{\mathcal{S}^c}\|_1 \leq \|\theta^*\|_1 \implies \\ \|\mathbf{v}_{\mathcal{S}^c}\|_1 &\leq \|\mathbf{v}_{\mathcal{S}}\|_1 \implies \|\mathbf{v}\|_1 \leq 2\|\mathbf{v}_{\mathcal{S}}\|_1 \leq 2\sqrt{s}\|\mathbf{v}_{\mathcal{S}}\|_2 \leq 2\sqrt{s} \end{aligned}$$

With probability at least  $1 - p^{-2.5}$ , we have for any  $\mathbf{v} \in \mathcal{C} \cap \mathbb{S}^{p-1}$

$$\begin{aligned} \mathbf{v}^T \hat{\Sigma} \mathbf{v} &\geq \mathbf{v}^T \tilde{\Sigma} \mathbf{v} - \left| \mathbf{v}^T (\hat{\Sigma} - \tilde{\Sigma}) \mathbf{v} \right| \\ &\geq \lambda_{\min} - \left| \sum_{1 \leq i, j \leq p} v_i v_j (\hat{\sigma}_{ij} - \tilde{\sigma}_{ij}) \right| \\ &\geq \lambda_{\min} - \|\mathbf{v}\|_1^2 \left\| \hat{\Sigma} - \tilde{\Sigma} \right\|_{\max} \geq \lambda_{\min} - 12\pi\sqrt{\frac{s^2 \log p}{n}}, \end{aligned}$$

where we use Lemma 1 and the fact that  $\|\mathbf{v}\|_1 \leq 2\sqrt{s}$ .

Since we choose  $n \geq \left(\frac{24\pi}{\lambda_{\min}}\right)^2 s^2 \log p$ , we have

$$\mathbf{v}^T \hat{\Sigma} \mathbf{v} \geq \lambda_{\min} - 12\pi\sqrt{\frac{s^2 \log p}{n}} \geq \lambda_{\min} - \frac{\lambda_{\min}}{2} = \frac{\lambda_{\min}}{2},$$

which completes the proof.

## 3 Proof of Theorem 2

**Statement of Theorem:** *Let  $\mathbf{X} = [\mathbf{x}_1, \mathbf{x}_2, \dots, \mathbf{x}_n]^T$  be i.i.d. samples of  $\mathbf{x} \sim TE(\tilde{\Sigma}, \xi, \mathbf{f})$  for which the sign sub-*

Gaussian condition holds with constant  $\kappa$ . Define the constant

$$c_0 = \max \left\{ \frac{320\kappa\pi^4 \|\tilde{\Sigma}\|_2^2}{\lambda_{\min}^2}, \frac{\pi^2}{\lambda_{\min}} \right\},$$

in which  $\lambda_{\min}$  is the smallest eigenvalue  $\tilde{\Sigma}$ . If  $n \geq \frac{128c_0}{\lambda_{\min}} s \log p = O(s \log p)$ , with probability at least  $1 - \frac{2}{p} - \frac{1}{p^2}$ ,  $\hat{\Sigma}$  satisfies the following RE condition,

$$\inf_{\mathbf{v} \in \mathcal{C} \cap \mathbb{S}^{p-1}} \mathbf{v}^T \hat{\Sigma} \mathbf{v} \geq \frac{\lambda_{\min}}{2}, \quad (\text{S.5})$$

where  $\mathcal{C}$  is defined in (21).

To prove Theorem 2, we first formally state below the convergence result for  $\hat{\Sigma}$  and  $\tilde{\Sigma}$  in [1].

**Lemma A (Theorem 4.10 in [1])** Let  $\mathbf{X} = [\mathbf{x}_1, \mathbf{x}_2, \dots, \mathbf{x}_n]^T$  be i.i.d. samples of  $\mathbf{x} \sim TE(\tilde{\Sigma}, \xi, \mathbf{f})$  for which the sign sub-Gaussian condition holds with constant  $\kappa$ . With probability at least  $1 - 2\alpha - \alpha^2$ ,  $\hat{\Sigma}$  constructed from  $\mathbf{X}$  satisfies

$$\|\hat{\Sigma} - \tilde{\Sigma}\|_{2, s_0} \leq \pi^2 \left( \frac{s_0 \log p}{n} + 2\sqrt{2\kappa} \|\tilde{\Sigma}\|_2 \sqrt{\frac{s_0(3 + \log(p/s_0)) + \log(1/\alpha)}{n}} \right), \quad (\text{S.6})$$

where  $\|\mathbf{A}\|_{2, s_0} \triangleq \sup_{\mathbf{v} \in \mathbb{S}^{p-1}, \|\mathbf{v}\|_0 \leq s_0} \mathbf{v}^T \mathbf{A} \mathbf{v}$ .

The next step for showing Theorem 2 is to extend the RE condition on all  $s_0$ -sparse unit vectors ( $s_0$  needs to be appropriately specified) to all unit vectors inside the targeted descent cone  $\mathcal{C}$ . Lemma B accomplishes this goal.

**Lemma B** Given  $\hat{\Sigma}$  constructed from  $\mathbf{X}$  whose rows are generated from  $\mathbf{x} \sim TE(\tilde{\Sigma}, \xi, \mathbf{f})$ , we assume that for every  $s_0$ -sparse unit vector  $\mathbf{v}$ , the condition  $\mathbf{v}^T \hat{\Sigma} \mathbf{v} \geq \mu$  is satisfied. Then we have for any  $\mathbf{u} \in \mathcal{C} \cap \mathbb{S}^{p-1}$ ,

$$\mathbf{u}^T \hat{\Sigma} \mathbf{u} \geq \mu - \frac{4s}{s_0 - 1} (1 - \mu). \quad (\text{S.7})$$

*Proof:* For any  $\mathbf{u} \in \mathcal{C} \cap \mathbb{S}^{p-1}$ , let  $\mathbf{z} \in \mathbb{R}^p$  be a random vector defined by

$$\mathbb{P}(\mathbf{z} = \|\mathbf{u}\|_1 \text{sign}(u_i) \cdot \mathbf{e}_i) = \frac{|u_i|}{\|\mathbf{u}\|_1}, \quad (\text{S.8})$$

where  $\{\mathbf{e}_i\}_{i=1}^p$  is the canonical basis of  $\mathbb{R}^p$ . Therefore,  $\mathbb{E}[\mathbf{z}] = \mathbf{u}$ . Let  $\mathbf{z}_1, \mathbf{z}_2, \dots, \mathbf{z}_{s_0}$  be independent copies of  $\mathbf{z}$  and set  $\bar{\mathbf{z}} = \frac{1}{s_0} \sum_{i=1}^{s_0} \mathbf{z}_i$ . Therefore  $\bar{\mathbf{z}}$  is an  $s_0$ -sparse vector, and by our assumption on quadratic forms on  $s_0$ -sparse vectors

$$\bar{\mathbf{z}}^T \hat{\Sigma} \bar{\mathbf{z}} \geq \mu \|\bar{\mathbf{z}}\|_2^2 \implies \mathbb{E}[\bar{\mathbf{z}}^T \hat{\Sigma} \bar{\mathbf{z}}] \geq \mu \mathbb{E}[\|\bar{\mathbf{z}}\|_2^2], \quad (\text{S.9})$$

where the expectation is taken w.r.t  $\bar{\mathbf{z}}$ . Since  $\bar{\mathbf{z}} = \frac{1}{s_0} \sum_{i=1}^{s_0} \mathbf{z}_i$ , we have

$$\begin{aligned} \mathbb{E}[\bar{\mathbf{z}}^T \hat{\Sigma} \bar{\mathbf{z}}] &= \frac{1}{s_0^2} \sum_{1 \leq i, j \leq s_0} \mathbb{E}[\mathbf{z}_i^T \hat{\Sigma} \mathbf{z}_j] \\ &= \frac{1}{s_0^2} \sum_{\substack{1 \leq i, j \leq s_0 \\ i \neq j}} \mathbb{E}[\mathbf{z}_i^T \hat{\Sigma} \mathbf{z}_j] + \frac{1}{s_0^2} \sum_{1 \leq i \leq s_0} \mathbb{E}[\mathbf{z}_i^T \hat{\Sigma} \mathbf{z}_i] \\ &= \frac{s_0(s_0 - 1)}{s_0^2} \mathbf{u}^T \hat{\Sigma} \mathbf{u} + \frac{s_0}{s_0^2} \sum_{i=1}^p \frac{|u_i|}{\|\mathbf{u}\|_1} \|\mathbf{u}\|_1^2 \hat{\sigma}_{ii} \\ &= \frac{s_0 - 1}{s_0} \mathbf{u}^T \hat{\Sigma} \mathbf{u} + \frac{\|\mathbf{u}\|_1^2}{s_0}, \end{aligned}$$

since  $\hat{\sigma}_{ii} = 1$ , and  $\sum_{i=1}^p \frac{|u_i|}{\|\mathbf{u}\|_1} = 1$ . Replacing  $\hat{\Sigma}$  in the above expression by the identity matrix  $\mathbf{I} \in \mathbb{R}^{p \times p}$ , we have

$$\mathbb{E}[\|\bar{\mathbf{z}}\|_2^2] = \frac{s_0 - 1}{s_0} \|\mathbf{u}\|_2^2 + \frac{\|\mathbf{u}\|_1^2}{s_0}.$$

Plugging both these expressions back in (S.9), we have

$$\begin{aligned} \frac{s_0 - 1}{s_0} \mathbf{u}^T \hat{\Sigma} \mathbf{u} + \frac{\|\mathbf{u}\|_1^2}{s_0} &\geq \mu \frac{s_0 - 1}{s_0} \|\mathbf{u}\|_2^2 + \mu \frac{\|\mathbf{u}\|_1^2}{s_0} \implies \\ \mathbf{u}^T \hat{\Sigma} \mathbf{u} &\geq \mu \|\mathbf{u}\|_2^2 - \frac{\|\mathbf{u}\|_1^2}{s_0 - 1} (1 - \mu) \geq \mu - \frac{4s}{s_0 - 1} (1 - \mu), \end{aligned}$$

where we use the facts that  $\|\mathbf{u}\|_2 = 1$  and  $\|\mathbf{u}\|_1 \leq 2\sqrt{s}$ . That completes the proof.  $\blacksquare$

Equipped with Lemma A and B, we present the proof of Theorem 2.

*Proof of Theorem 2:* For Lemma A, we set  $\alpha = \frac{1}{p}$ ,  $s_0 = \frac{16s}{\lambda_{\min}}$ , and let  $c_0 = \max\{\frac{320\kappa\pi^4 \|\tilde{\Sigma}\|_2^2}{\lambda_{\min}^2}, \frac{\pi^2}{\lambda_{\min}}\}$ . When  $n \geq \frac{128c_0}{\lambda_{\min}} s \log p = 8c_0 s_0 \log p$ , by Lemma A, we have

$$\begin{aligned} \|\hat{\Sigma} - \tilde{\Sigma}\|_{2, s_0} &\leq \pi^2 \left( \frac{s_0 \log p}{n} + 2\sqrt{2\kappa} \|\tilde{\Sigma}\|_2 \sqrt{\frac{s_0(3 + \log(p/s_0)) + \log p}{n}} \right) \\ &\leq \pi^2 \left( \frac{s_0 \log p}{\frac{\pi^2}{\lambda_{\min}} \cdot 8s_0 \log p} + 2\sqrt{2\kappa} \|\tilde{\Sigma}\|_2 \sqrt{\frac{s_0(3 + \log(p/s_0)) + \log p}{\frac{320\kappa\pi^4 \|\tilde{\Sigma}\|_2^2}{\lambda_{\min}^2} \cdot 8s_0 \log p}} \right) \\ &\leq \pi^2 \left( \frac{\lambda_{\min}}{\pi^2} \sqrt{\frac{5s_0 \log p}{320s_0 \log p}} + \frac{\lambda_{\min}}{\pi^2} \frac{s_0 \log p}{8s_0 \log p} \right) \\ &\leq \frac{\lambda_{\min}}{8} + \frac{\lambda_{\min}}{8} = \frac{\lambda_{\min}}{4}, \end{aligned}$$

with probability at least  $1 - \frac{2}{p} - \frac{1}{p^2}$ . It follows that for any  $s_0$ -sparse unit vector  $\mathbf{v}$ ,

$$\begin{aligned} \mathbf{v}^T \hat{\Sigma} \mathbf{v} &\geq \mathbf{v}^T \tilde{\Sigma} \mathbf{v} - \left| \mathbf{v}^T (\hat{\Sigma} - \tilde{\Sigma}) \mathbf{v} \right| \\ &\geq \lambda_{\min} - \|\hat{\Sigma} - \tilde{\Sigma}\|_{2, s_0} \geq \frac{3}{4} \lambda_{\min}, \end{aligned}$$

which satisfies the assumption in Lemma B with  $\mu = \frac{3}{4} \lambda_{\min}$ . With the same  $s_0 = \frac{16s}{\lambda_{\min}}$ , by Lemma B, we have for any  $\mathbf{v} \in \mathcal{C} \cap \mathbb{S}^{p-1}$ ,

$$\begin{aligned} \mathbf{v}^T \hat{\Sigma} \mathbf{v} &\geq \frac{3}{4} \lambda_{\min} - \frac{4s}{\frac{16s}{\lambda_{\min}} - 1} \left( 1 - \frac{3}{4} \lambda_{\min} \right) \\ &\geq \frac{3}{4} \lambda_{\min} - \frac{4s}{\frac{16s}{\lambda_{\min}} - 12s} \left( 1 - \frac{3}{4} \lambda_{\min} \right) \\ &= \frac{3}{4} \lambda_{\min} - \frac{4s}{\frac{16s}{\lambda_{\min}} (1 - \frac{3}{4} \lambda_{\min})} \left( 1 - \frac{3}{4} \lambda_{\min} \right) \\ &= \frac{3}{4} \lambda_{\min} - \frac{\lambda_{\min}}{4} = \frac{\lambda_{\min}}{2}, \end{aligned}$$

which completes the proof.  $\blacksquare$

## 4 Proof of Theorem 3

**Statement of Theorem:** Given any monotone cone  $\mathcal{M}$ , the following equality holds

$$P_{\mathcal{M} \cap \mathcal{L} \cap \mathcal{B}}(\cdot) = P_{\mathcal{B}}(P_{\mathcal{L}}(P_{\mathcal{M}}(\cdot))), \quad (\text{S.10})$$

where  $P_{\mathcal{L}}(\mathbf{z}) = \mathbf{z} - \frac{\mathbf{1}^T \mathbf{z}}{n} \cdot \mathbf{1}$  and  $P_{\mathcal{B}}(\mathbf{z}) = \min\{\frac{\sqrt{n}}{\|\mathbf{z}\|_2}, 1\} \cdot \mathbf{z}$ .

*Proof:* It is easy to verify the analytic expression for  $P_{\mathcal{L}}(\cdot)$  and  $P_{\mathcal{B}}(\cdot)$ . To show (S.10), we let  $\mathbf{x}^* = P_{\mathcal{M}}(\mathbf{z})$  and  $\tilde{\mathbf{x}}^* = P_{\mathcal{M} \cap \mathcal{L} \cap \mathcal{B}}(\mathbf{z})$ . We assume w.l.o.g. that the monotone cone is  $\mathcal{M} = \{\mathbf{x} \mid x_1 \geq x_2 \geq \dots \geq x_n\}$ . By introducing the Lagrange multipliers  $\boldsymbol{\lambda} = [\lambda_1, \dots, \lambda_{n-1}]^T$ , the isotonic regression  $P_{\mathcal{M}}(\mathbf{z})$  can be casted as

$$\max_{\boldsymbol{\lambda} \geq \mathbf{0}} \min_{\mathbf{x}} g(\mathbf{x}, \boldsymbol{\lambda}) = \frac{1}{2} \|\mathbf{x} - \mathbf{z}\|_2^2 + \sum_{i=1}^{n-1} \lambda_i (x_i - x_{i+1}),$$

where we use the strong duality. The optimum  $\mathbf{x}^*$  has to satisfy the stationarity  $\nabla_{\mathbf{x}} g(\mathbf{x}, \boldsymbol{\lambda}) = \mathbf{0}$ , i.e.,

$$\begin{aligned} x_1^* - z_1 + \lambda_1 &= 0, \\ x_2^* - z_2 - \lambda_1 + \lambda_2 &= 0, \\ &\vdots \\ x_{n-1}^* - z_{n-1} - \lambda_{n-2} + \lambda_{n-1} &= 0, \\ x_n^* - z_n - \lambda_{n-1} &= 0. \end{aligned} \quad (\text{S.11})$$

Using (S.11) to express  $\mathbf{x}^*$  in terms of  $\boldsymbol{\lambda}$ , we denote  $\min_{\boldsymbol{\lambda}} g(\mathbf{x}, \boldsymbol{\lambda})$  by another function  $h(\boldsymbol{\lambda})$ , and the optimal dual variables  $\boldsymbol{\lambda}^*$  satisfies

$$\boldsymbol{\lambda}^* = \operatorname{argmax}_{\boldsymbol{\lambda} \geq \mathbf{0}} h(\boldsymbol{\lambda}).$$

For the standardized isotonic regression  $P_{\mathcal{M} \cap \mathcal{L} \cap \mathcal{B}}(\mathbf{z})$ , we can also introduce the Lagrange multipliers  $\boldsymbol{\lambda} = [\lambda_1, \dots, \lambda_{n-1}]^T$ ,  $\beta$  and  $\gamma$ , and obtain the following optimization problem

$$\begin{aligned} \max_{\boldsymbol{\lambda} \geq \mathbf{0}, \gamma \leq 0, \beta} \min_{\mathbf{x}} \tilde{g}(\mathbf{x}, \boldsymbol{\lambda}, \beta, \gamma) &= \frac{1}{2} \|\mathbf{x} - \mathbf{z}\|_2^2 \\ &+ \sum_{i=1}^{n-1} \lambda_i (x_i - x_{i+1}) + \beta \sum_{i=1}^n x_i + \gamma (n - \|\mathbf{x}\|_2^2). \end{aligned} \quad (\text{S.12})$$

Again the optimum  $\tilde{\mathbf{x}}^*$  has to satisfy  $\nabla_{\mathbf{x}} \tilde{g}(\tilde{\mathbf{x}}^*, \boldsymbol{\lambda}, \beta, \gamma)$ ,

$$\begin{aligned} (1 - 2\gamma) \tilde{x}_1^* - z_1 + \beta + \lambda_1 &= 0, \\ (1 - 2\gamma) \tilde{x}_2^* - z_2 + \beta - \lambda_1 + \lambda_2 &= 0, \\ &\vdots \\ (1 - 2\gamma) \tilde{x}_{n-1}^* - z_{n-1} + \beta - \lambda_{n-2} + \lambda_{n-1} &= 0, \\ (1 - 2\gamma) \tilde{x}_n^* - z_n + \beta - \lambda_{n-1} &= 0. \end{aligned} \quad (\text{S.13})$$

By substituting  $\tilde{\mathbf{x}}^*$  for  $\boldsymbol{\lambda}$ ,  $\beta$  and  $\gamma$ , we have

$$\begin{aligned} \min_{\mathbf{x}} \tilde{g}(\mathbf{x}, \boldsymbol{\lambda}, \beta, \gamma) &= \frac{1 - 2\gamma}{2} \sum_{i=1}^n \left( \tilde{x}_i^* - \frac{z_i - \beta}{1 - 2\gamma} \right)^2 \\ &+ \sum_{i=1}^{n-1} \lambda_i (\tilde{x}_i^* - \tilde{x}_{i+1}^*) + \frac{\|\mathbf{z}\|_2^2}{2} - \frac{\sum_{i=1}^n (z_i - \beta)^2}{2(1 - 2\gamma)} + \gamma n \\ &= \frac{h(\boldsymbol{\lambda})}{1 - 2\gamma} + \frac{\|\mathbf{z}\|_2^2}{2} - \frac{\sum_{i=1}^n (z_i - \beta)^2}{2(1 - 2\gamma)} + \gamma n, \end{aligned}$$

in which we note that the last three terms are free of  $\boldsymbol{\lambda}$ . Hence the optimal  $\boldsymbol{\lambda}$  for standardized isotonic regression,

$$\begin{aligned} \tilde{\boldsymbol{\lambda}}^* &= \operatorname{argmax}_{\boldsymbol{\lambda} \geq \mathbf{0}} \frac{h(\boldsymbol{\lambda})}{1 - 2\gamma} + \frac{\|\mathbf{z}\|_2^2}{2} - \frac{\sum_{i=1}^n (z_i - \beta)^2}{2(1 - 2\gamma)} + \gamma n \\ &= \operatorname{argmax}_{\boldsymbol{\lambda} \geq \mathbf{0}} h(\boldsymbol{\lambda}) \end{aligned}$$

is the same as the one for isotonic regression. Thus, combining (S.11) and (S.13), we have

$$\tilde{\mathbf{x}}^* = \frac{\mathbf{x}^* - \beta \cdot \mathbf{1}}{1 - 2\gamma}. \quad (\text{S.14})$$

On the other hand, by summing up the equations respectively in (S.11) and (S.13) and using the primal feasibility  $\sum_{i=1}^n \tilde{x}_i^* = 0$ , we have

$$\sum_{i=1}^n x_i^* = \sum_{i=1}^n z_i, \quad \sum_{i=1}^n z_i = n\beta \implies \beta = \frac{\mathbf{1}^T \mathbf{x}^*}{n},$$

which implies that

$$\mathbf{x}^* - \beta \cdot \mathbf{1} = P_{\mathcal{L}}(\mathbf{x}^*) = P_{\mathcal{L}}(P_{\mathcal{M}}(\mathbf{z})). \quad (\text{S.15})$$

Denoting  $\mathbf{x}^* - \beta \cdot \mathbf{1}$  by  $\hat{\mathbf{x}}^*$ , we now show that scaling  $\hat{\mathbf{x}}^*$  by  $\frac{1}{1-2\gamma}$  is exactly the projection onto  $\mathcal{B}$ . If  $\|\hat{\mathbf{x}}^*\|_2 > \sqrt{n}$ ,

then  $\gamma < 0$  due to (S.14) and primal feasibility  $\|\tilde{\mathbf{x}}^*\|_2 \leq \sqrt{n}$ . By complementary slackness  $\gamma(n - \|\tilde{\mathbf{x}}^*\|_2^2) = 0$ , we have  $\|\tilde{\mathbf{x}}^*\|_2 = \sqrt{n}$ . If  $\|\hat{\mathbf{x}}^*\|_2 < \sqrt{n}$ , then  $\|\tilde{\mathbf{x}}^*\|_2 < \sqrt{n}$  due to (S.14) and dual feasibility  $\gamma \leq 0$ . It follows from complementary slackness that  $\gamma = 0$ , which result in  $\tilde{\mathbf{x}}^* = \hat{\mathbf{x}}^*$ . If  $\|\hat{\mathbf{x}}^*\|_2 = \sqrt{n}$ , by similar argument, we have  $\tilde{\mathbf{x}}^* = \hat{\mathbf{x}}^*$  as well. In a word, we have

$$\tilde{\mathbf{x}}^* = \begin{cases} \hat{\mathbf{x}}^*, & \text{if } \|\hat{\mathbf{x}}^*\|_2 \leq \sqrt{n} \\ \frac{\sqrt{n}}{\|\hat{\mathbf{x}}^*\|_2} \hat{\mathbf{x}}^*, & \text{if } \|\hat{\mathbf{x}}^*\|_2 > \sqrt{n} \end{cases},$$

which matches the expression for  $P_B(\cdot)$ . Thus we complete the proof by noting  $\tilde{\mathbf{x}}^* = P_B(\hat{\mathbf{x}}^*) = P_B(P_{\mathcal{L}}(P_{\mathcal{M}}(\mathbf{z})))$ . ■

## References

- [1] F. Han and H. Liu. Optimal rates of convergence for latent generalized correlation matrix estimation in transelliptical distribution. *arXiv:1305.6916*, 2013.
- [2] Wassily Hoeffding. Probability Inequalities for Sums of Bounded Random Variables. *Journal of the American Statistical Association*, 58:13–30, 1963.
- [3] F. Lindskog, A. McNeil, and U. Schmock. Kendalls tau for elliptical distributions. In *Credit Risk, Contributions to Economics*, pages 149–156. Physica-Verlag HD, 2003.
